# Supplementary material for: Enhanced amperometric detection of tumor biomarker vanillylmandelic acid using NiMoO 4 @C 3 N 5 hybrid nanostructures
Source: Royal Society of Chemistry journal article supplement (doi:10.1039/d5tb01618e), 2025-01-01
Supplement: d5tb01618e1.pdf [file d5tb01618e1.pdf]

## ***Enhanced Amperometric Detection of Tumor Biomarker Vanillylmandelic Acid Using NiMoO<sub>4</sub>@C<sub>3</sub>N<sub>5</sub> Hybrid Nanostructures***

*Nirmal Kumar Sakthivel<sup>1,2</sup>, Sakthivel Kogularasu<sup>3,4</sup>, Yung-Lung Chen<sup>5,6</sup>, Wan-Ching Lin<sup>7,8</sup>, Guo-Ping Chang-Chien<sup>3,4\*</sup>, Hisham S.M. Abd-Rabboh<sup>9</sup>, Mani Govindasamy,<sup>1,2\*</sup>*

*<sup>1</sup>International Ph. D program in Innovative Technology of Biomedical Engineering & Medical Devices, Ming Chi University of Technology, New Taipei City, Taiwan.*

*<sup>2</sup> Research Center for Intelligence Medical Devices, Ming Chi University of Technology, New Taipei City, 243303, Taiwan.*

*<sup>3</sup>Institute of Environmental Toxin and Emerging-Contaminant, Cheng Shiu University, Kaohsiung 833301, Taiwan.*

*<sup>4</sup>Center for Environmental Toxin and Emerging-Contaminant Research, Cheng Shiu University, Kaohsiung 833301, Taiwan.*

*<sup>5</sup>Division of Cardiology, Department of Internal Medicine, Kaohsiung Chang Gung Memorial Hospital, College of Medicine, Chang Gung University, Kaohsiung 833, Taiwan.*

*<sup>6</sup>Graduate Institute of Clinical Medical Sciences, College of Medicine, Chang Gung University, Taoyuan 333, Taiwan.*

*<sup>7</sup>Department of Neuroradiology, E-da Hospital, I-Shou University, Kaohsiung 84001, Taiwan.*

*<sup>8</sup>Department of Neurosurgery, E-da Hospital, I-Shou University, Kaohsiung 84001, Taiwan.*

*<sup>9</sup>Chemistry Department, Faculty of Science, King Khalid University, PO Box 9004, Abha 62223, Saudi Arabia.*

*\*Corresponding authors:*

*Prof. Guo-Ping Chang-Chien ([guoping@gcloud.csu.edu.tw](mailto:guoping@gcloud.csu.edu.tw))*

*Prof. Mani Govindasamy ([govindasamy420700@gmail.com](mailto:govindasamy420700@gmail.com))*

## S1. Materials and instrumentations

For crystal structure confirmation was done by wielding XRD (Bruker D8 Advance Eco, China) instrument. The morphological studies of the composite were characterized by FESEM (JSM-7610F, Taiwan) and High-Resolution TEM (JEM-2100, Taiwan) instrument. The electron impedance spectroscopy (EIS) studies (t equilibration = 2s; Fixed potential (0.2 V; Number of frequencies, 56 = 9.2/dec; Frequency range from 0.1 Hz to 100000 Hz) was taken by using Palmsens4 FRA device. All voltammetry studies (CV & i-t) were grabbed by using Palmsens4 FRA electrochemical analyzer device. For electrochemical studies, common three electrode system was used where, glassy carbon electrode and rotating disk electrode as a working electrode, platinum wire as a counter electrode and Ag/AgCl (3M KCl) as a reference electrode.

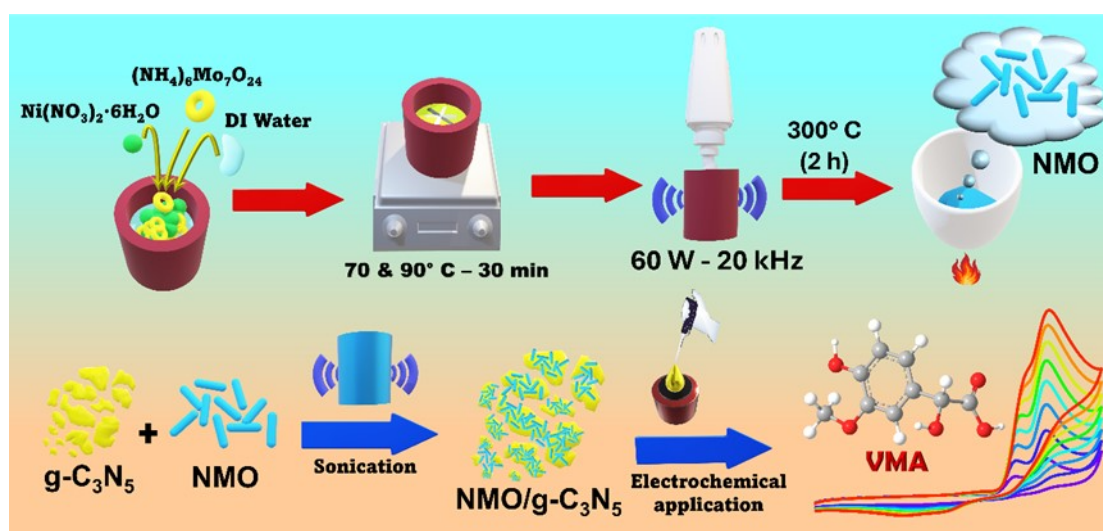

**Scheme S1.** Diagrammatic illustration for the synthesis of NMO nanorods.

## S2. Current Response for Potential Ranges

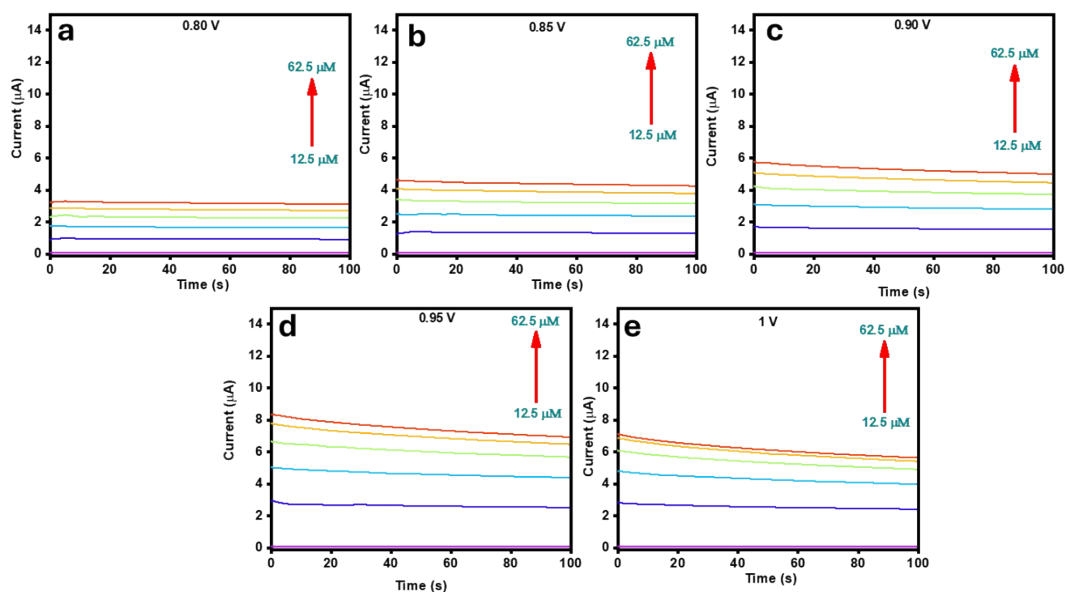

**Figure S1.** Amperometric response of different potentials in electrolyte solution pH 3.0. (a) 0.80 V, (b) 0.85 V, (c) 0.90 V, (d) 0.95 V, (e) 1.0 V.

### S3. Long-Term Stability and Real Sample Analysis

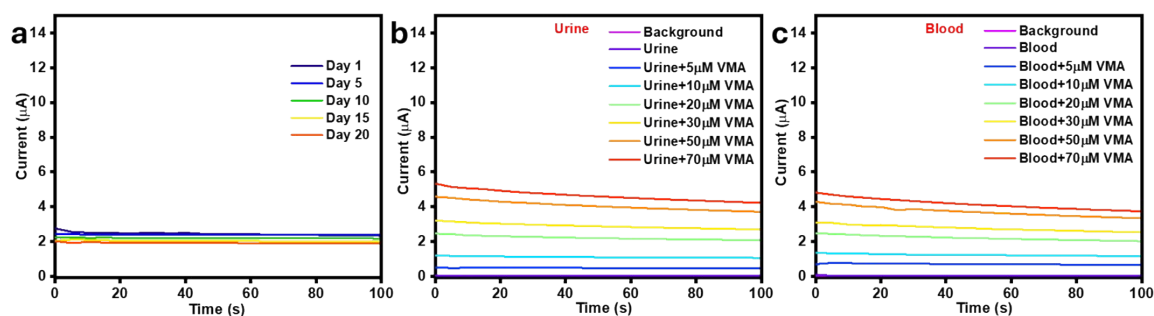

**Figure S2.** (a) Amperometric curve of NMO@C<sub>3</sub>N<sub>5</sub>-1:2 for different days, real sample analysis with various spiked concentrations of VMA in (b) urine sample and (c) blood sample.

### S4. Mechanism

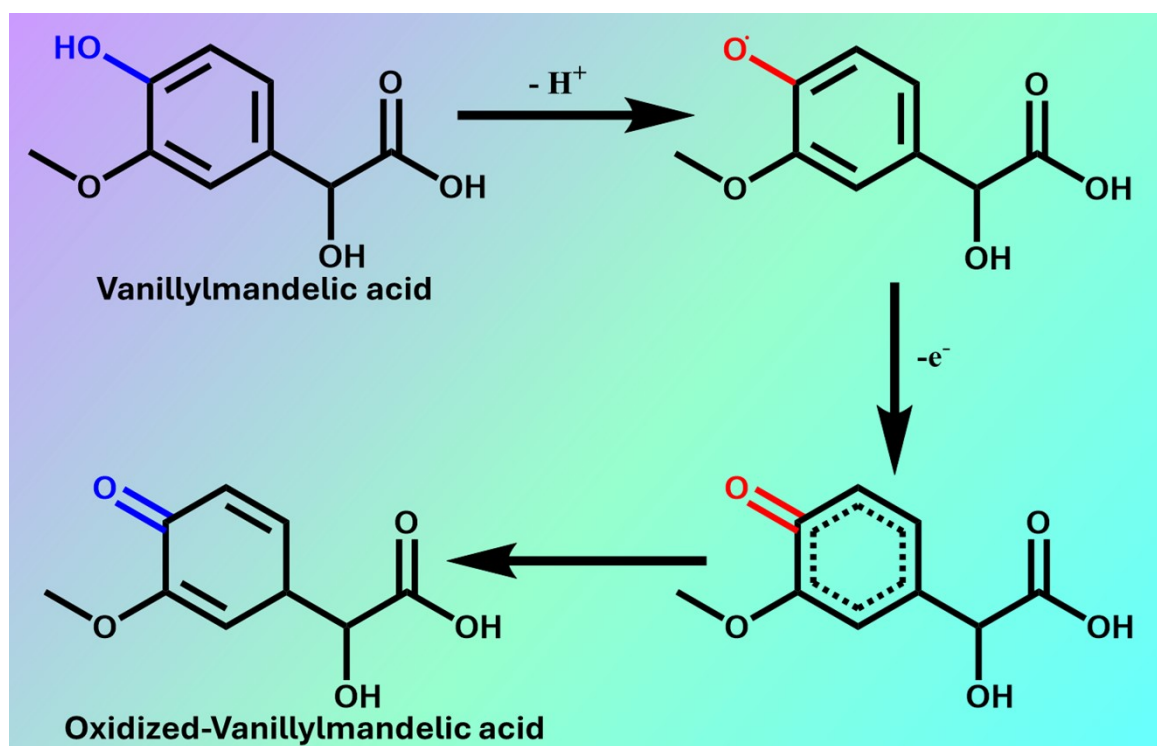

**Scheme S2.** Electron transfer in electrochemical mechanism of VMA oxidation.

**Table S1.** Real sample analysis using NMO@C<sub>3</sub>N<sub>5</sub>-1:2 /GCE in human blood and urine samples.

| Added<br>( $\mu\text{M}$ ) | Blood                   |             | Urine                   |             |
|----------------------------|-------------------------|-------------|-------------------------|-------------|
|                            | Found ( $\mu\text{M}$ ) | Recovery(%) | Found ( $\mu\text{M}$ ) | Recovery(%) |
| 0                          | 0                       | -           | 0                       | -           |
| 5                          | 4.84                    | 96.8        | 4.79                    | 95.8        |
| 10                         | 9.76                    | 97.6        | 9.68                    | 96.8        |
| 20                         | 18.81                   | 94.04       | 18.66                   | 93.3        |

|    |       |       |       |       |
|----|-------|-------|-------|-------|
| 30 | 28.96 | 96.43 | 28.53 | 95.09 |
| 50 | 47.82 | 95.64 | 47.14 | 94.28 |
| 70 | 67.48 | 96.36 | 66.93 | 95.57 |

---
